# Supplementary material
Source: publisher figshare collection journal article supplement (https://acs.figshare.com/ndownloader/files/3955498)
Supplement: Supplementary file 1 [file 3955498]

## Supporting Information

### Solvent/Temperature and Dipyriddy Ligands Induced Diverse Coordination Polymers

#### Based on 3-(2',5'-dicarboxylphenyl)pyridine

Bo Liu, Lei Wei, Nan-nan Li, Wei-Ping Wu, Hui Miao, Yao-Yu Wang,\* and Qi-Zhen Shi

Key Laboratory of Synthetic and Natural Functional Molecule Chemistry of the Ministry of Education, Shaanxi Key Laboratory of Physico-Inorganic Chemistry, College of Chemistry & Materials Science, Northwest University, Xi'an 710069, P. R. China

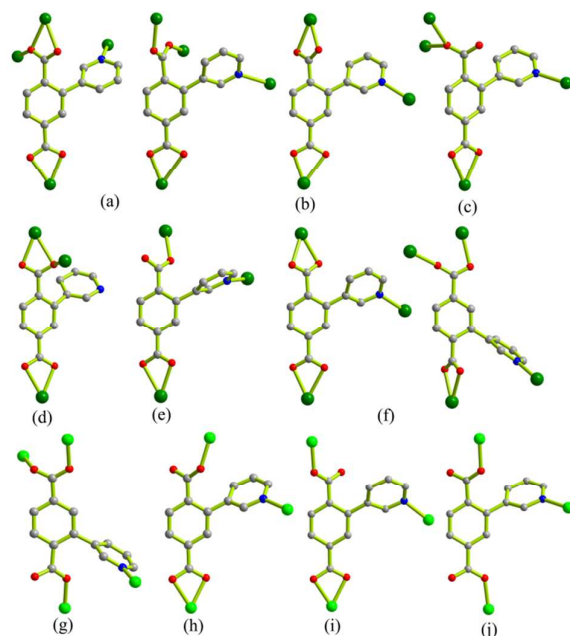

**Scheme S1.** The different bridging fashions of  $\text{dcpy}^{2-}$  in 1–11.

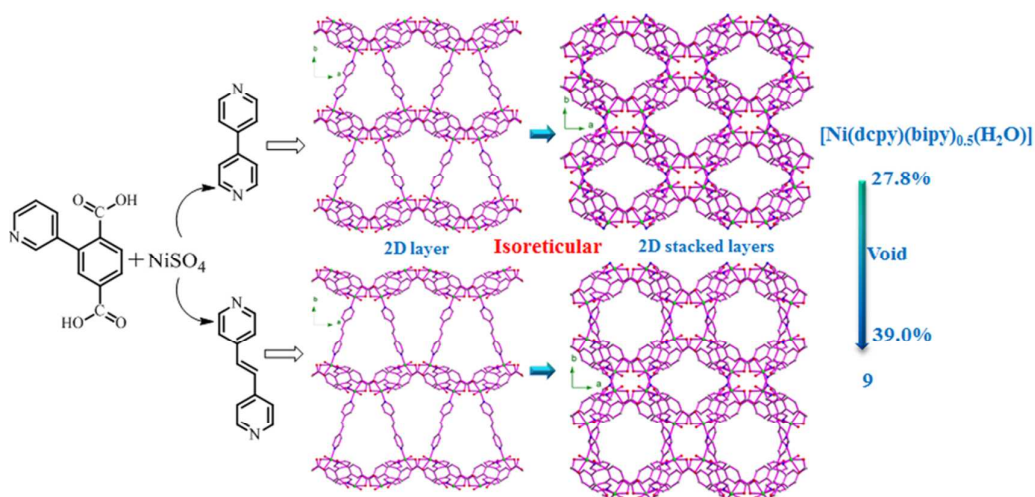

**Figure S1.** The structures of **9** and  $[\text{Ni}(\text{dcpy})(\text{bipy})_{0.5}(\text{H}_2\text{O})]$ , and their void volume.

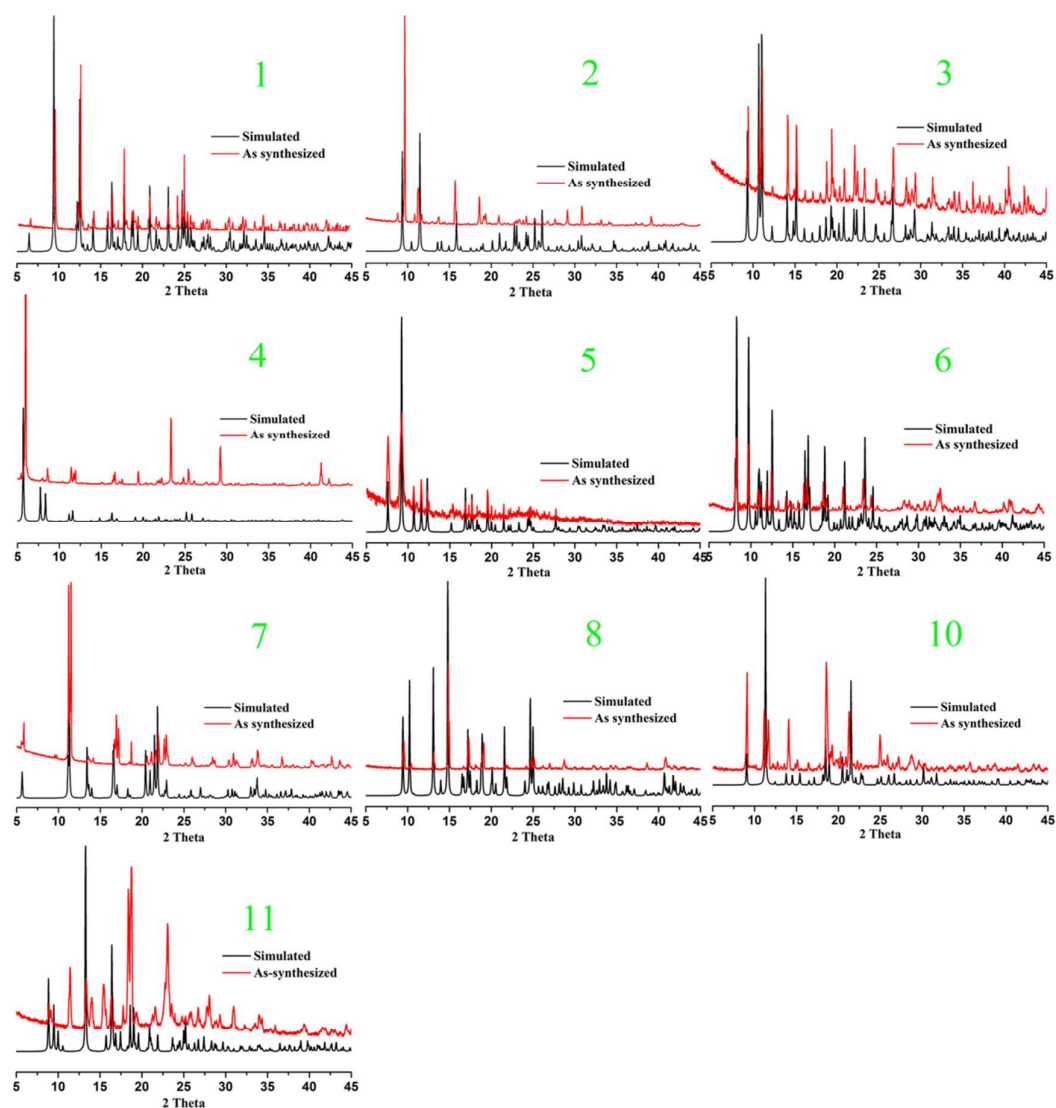

(a)

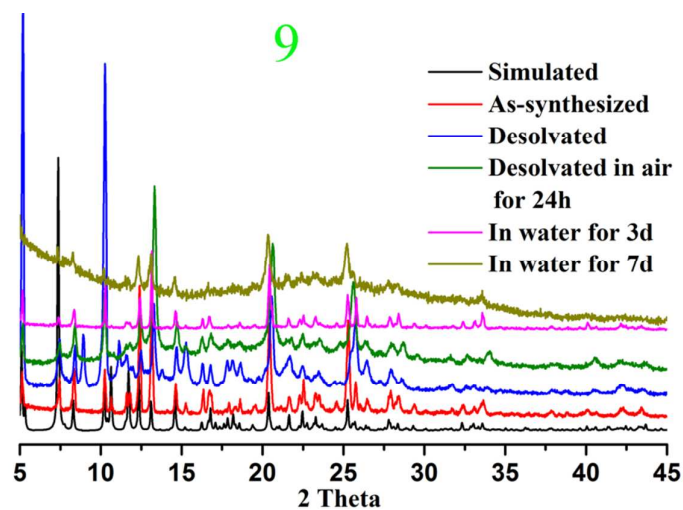

(b)

**Figure S2.** The PXRD patterns of **1–8**, **10** and **11** (Simulated: black; as-synthesized: blue) (a);  
PXRD patterns for **9** in different state (b).

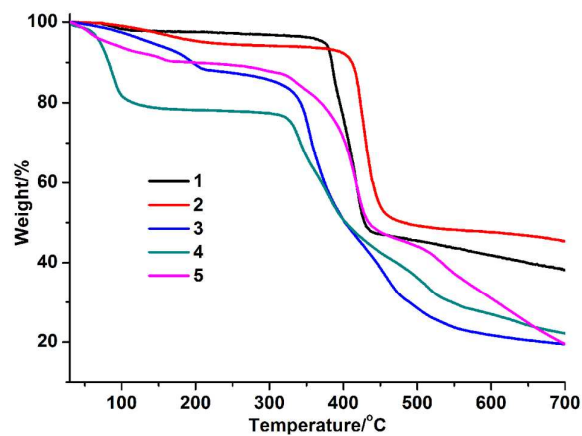

(a)

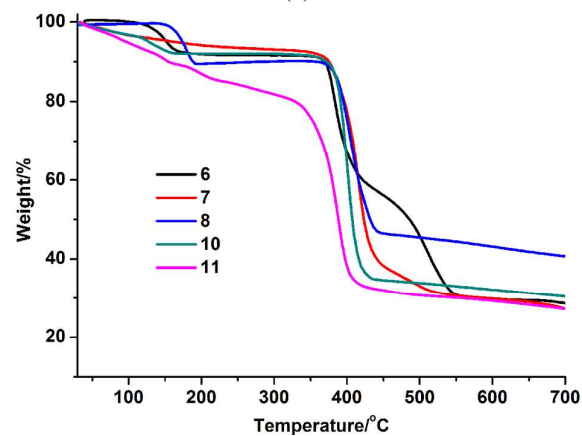

(b)

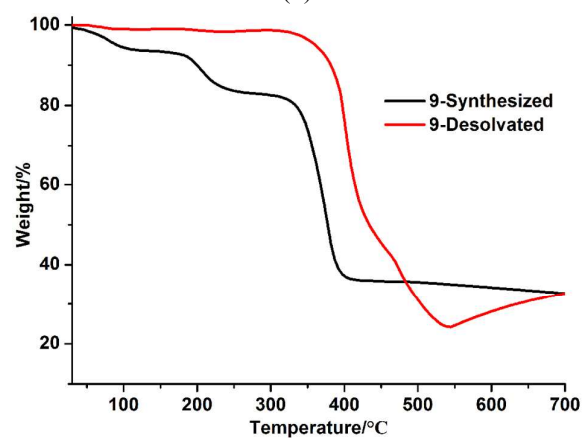

(c)

**Figure S3.** TGA plots of the synthesized samples of **1–5** (a), **6–8**, **10** and **11** (b), and the synthesized and desolvated samples of **9** (c).

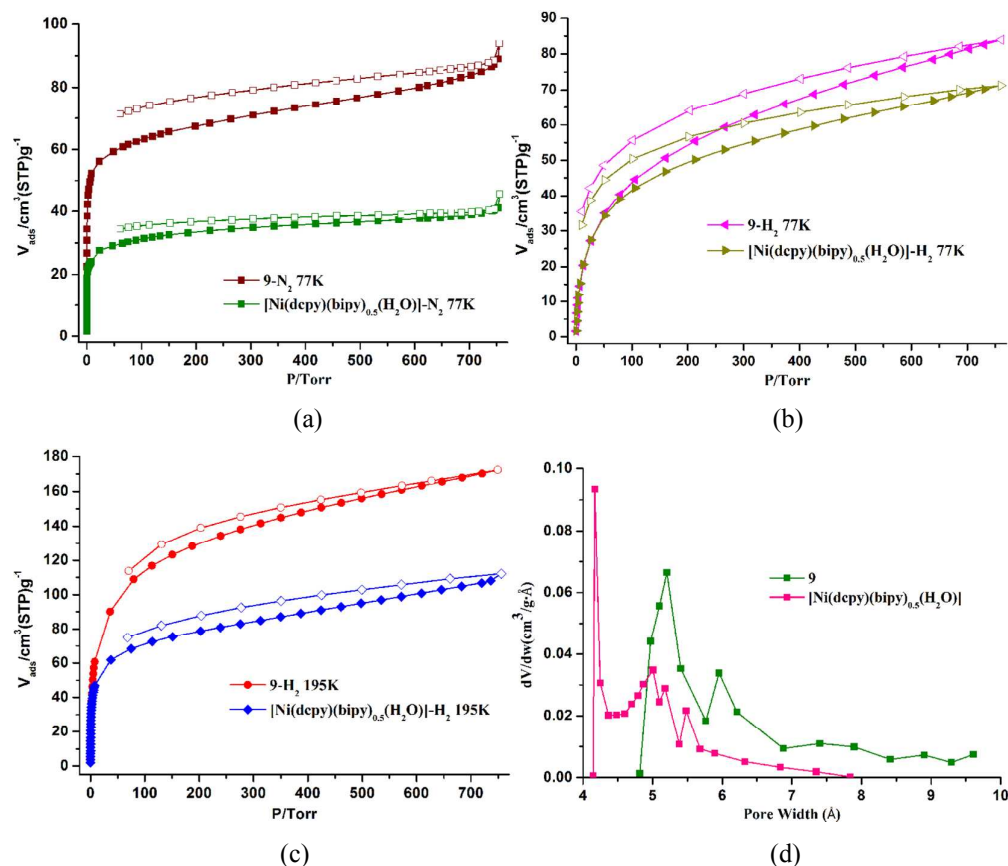

**Figure S4.** Gas sorption isotherms of **9** and  $[\text{Ni}(\text{dcp})(\text{bipy})_{0.5}(\text{H}_2\text{O})]$  for  $\text{N}_2$  (77 K) (a),  $\text{H}_2$  (77 K) (b) and  $\text{CO}_2$  (195 K) (c), and differential pore volume as a function of pore width calculated from the adsorption isotherm of  $\text{N}_2$  at 77 K using the Horvath-Kawazoe model (d).

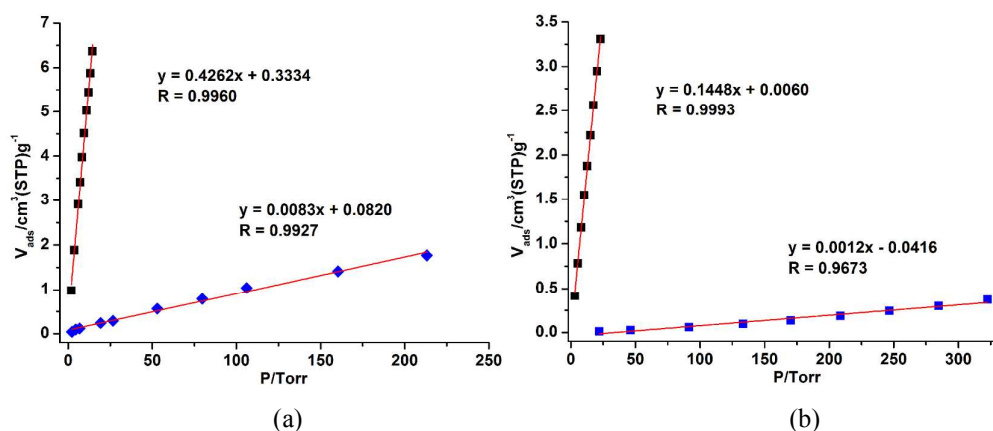

**Figure S5.** Initial slope calculation for  $\text{CO}_2$  and  $\text{N}_2$  isotherms collected at 273 K (a) and 298 K (b). ( $\text{CO}_2$ : black squares;  $\text{N}_2$ : blue squares).

### Calculation of sorption heat for CO<sub>2</sub> uptake using Virial 2 model

$$\ln P = \ln N + 1/T \sum_{i=0}^m aiN^i + \sum_{i=0}^n biN^i \quad Q_{st} = -R \sum_{i=0}^m aiN^i$$

The above equation was applied to fit the combined CO<sub>2</sub> isotherm data for desolvated **9** at 273 and 298 K, where  $P$  is the pressure,  $N$  is the adsorbed amount,  $T$  is the temperature,  $ai$  and  $bi$  are virial coefficients, and  $m$  and  $n$  are the number of coefficients used to describe the isotherms.  $Q_{st}$  is the coverage-dependent enthalpy of adsorption and  $R$  is the universal gas constant.

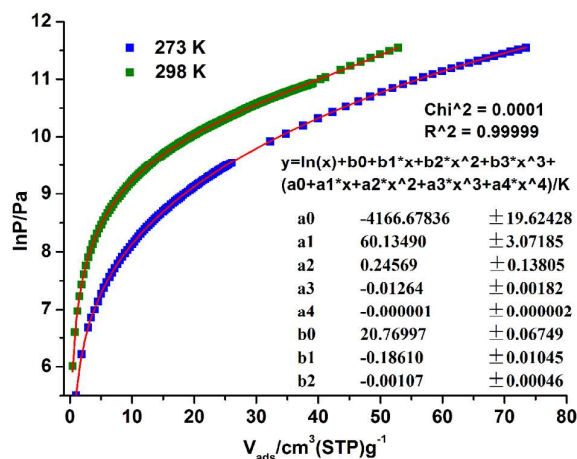

**Figure S6.** Virial analysis of the CO<sub>2</sub> sorption datas (273 and 298 K at 1 bar) for **9**.

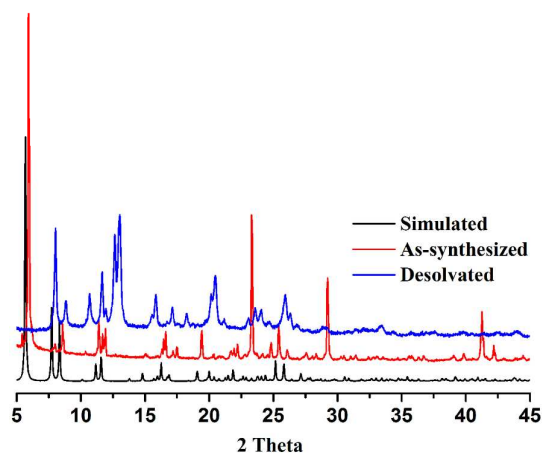

(a)

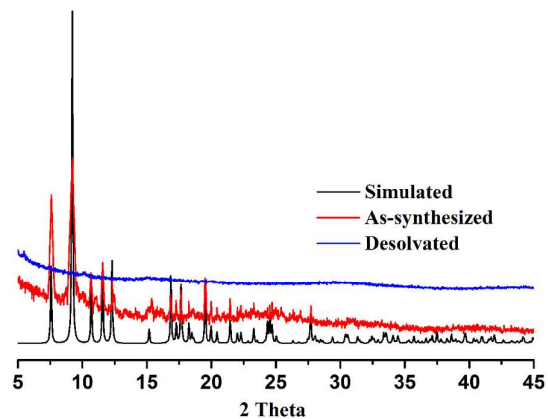

(b)

**Figure S7.** PXRD patterns of **4** (a) and **5** (b) simulated from the X-ray single-crystal structure, as-synthesized and desolvated samples.

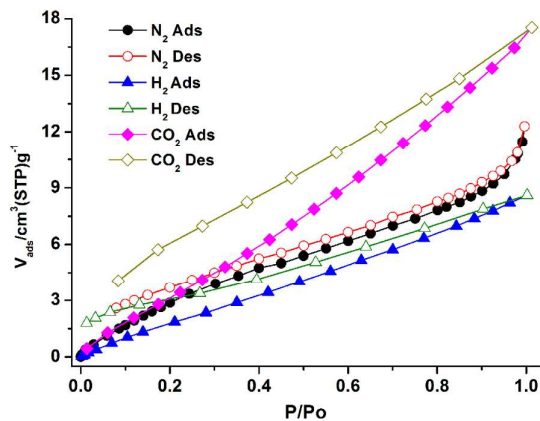

(a)

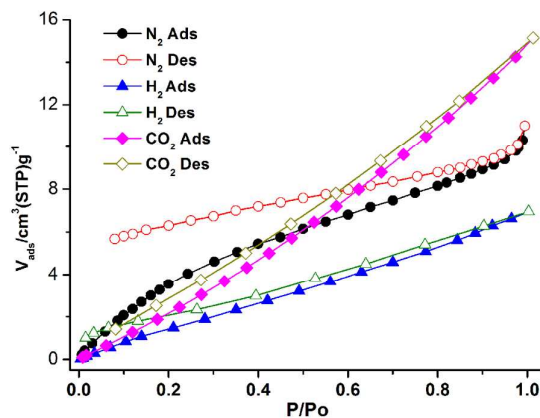

(b)

**Figure S8.** N<sub>2</sub> (77 K), H<sub>2</sub> (77 K) and CO<sub>2</sub> (195 K) gas sorption isotherms of **4** (a) and **5** (b).

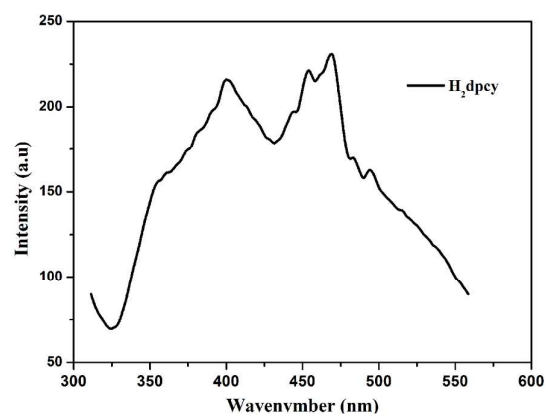

**Figure S9.** The emission spectra of the solid-state  $H_2dpcy$  ligand.
